# Supplementary material for: Elucidation of the sorbent role in sorption thermodynamics of uranium(vi) on goethite
Source: Royal Society of Chemistry journal article supplement (doi:10.1039/d1em00380a), 2022-01-01

## Supporting Information

### Elucidation of sorbent role in sorption thermodynamics of Uranium(VI) on goethite

**Sumit Kumar<sup>1,2\*</sup>, Rama Mohana Rao Dumpala<sup>3</sup>, Annapurna Chandane<sup>1</sup>, Jitendra  
Bahadur<sup>4</sup>**

<sup>1</sup>Radioanalytical Chemistry Division, Bhabha Atomic Research Centre, Mumbai - 400 085.

<sup>2</sup>Homi Bhabha National Institute, Anushaktinagar, Mumbai – 400 094.

<sup>3</sup>Radiochemistry Division, Bhabha Atomic Research Centre, Mumbai - 400 085.

<sup>3</sup>Solid State Physics Division, Bhabha Atomic Research Centre, Mumbai – 400 085.

\*: Corresponding Author

**E-mail id:** [sumitk@barc.gov.in](mailto:sumitk@barc.gov.in), Phone: +91-22-2559 5958. Fax: +91-22-2550 5151.

**Figure S1.** Potentiometric titration of goethite suspension (1 g/L in 0.1 M NaCl) by 0.1 M HCl/NaOH under anaerobic condition at 25 °C. The solid line corresponding to the data is the fit line calculated as per the surface complexation modelling adopted in the FITEQL program. The WSOS/DF for this fit was 9.9.

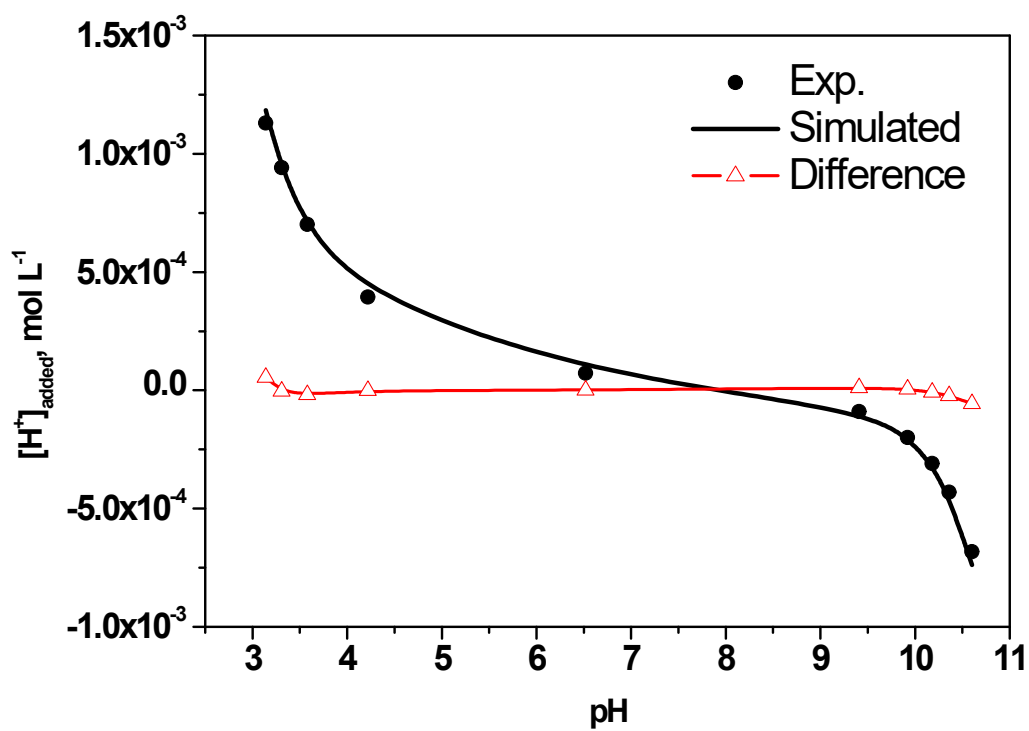

Supplement: d1em00380a1.pdf [file d1em00380a1.pdf]
